# Supplementary material for: Multiplexed gene control reveals rapid mRNA turnover
Source: PubMed Central journal article supplement — Sci Adv. 2017 Jul 12;3(7):e1700006. doi: 10.1126/sciadv.1700006 (PMC5507631; doi:10.1126/sciadv.1700006), 2017-07-12
Supplement: 1700006_SM.pdf [file 1700006_SM.pdf]

## Supplementary Materials for **Multiplexed gene control reveals rapid mRNA turnover**

Antoine Baudrimont, Sylvia Voegeli, Eduardo Calero Vilorio, Fabian Stritt, Marine Lenon, Takeo Wada, Vincent Jaquet, Attila Becskei

Published 12 July 2017, *Sci. Adv.* **3**, e1700006 (2017)  
DOI: 10.1126/sciadv.1700006

### The PDF file includes:

- fig. S1. The cell ploidy and the choice of reference mRNAs have no impact on measured half-lives.
- fig. S2. Pop-out of the chromosomally integrated plasmid is dispensable for half-life estimation of mature mRNA.
- fig. S3. The doubling time of the MGC strains (red dots) is similar to that of the parent diploid strain (black line).
- fig. S4. Insertional promoter strategy.
- fig. S5. Phenanthroline increases the number of P bodies.
- fig. S6. mRNA half-life has a major impact on response time of a protein in a negative feedback loop.
- fig. S7. Degradation rates and not synthesis rates affect the response time.
- fig. S8. Parameter estimation of the two-state model to fit the *USA1* RNA copy number distributions.
- fig. S9. Impact of 5'UTR length on the decay profiles of mRNAs with varying 5'UTR lengths.
- fig. S10. Design of the plasmids with the substitutional promoters and the strategy for chromosomal integration.
- fig. S11. Reverse transcription strategy.
- table S1. Plasmid list.
- table S2. Strain list.
- table S3. Cloned 5'UTR lengths of genes.
- table S4. qPCR primers detecting marked mRNAs and their amplification efficiencies.
- table S5. qPCR primers detecting endogenous mRNAs with their efficiencies.

- table S6. Cross-reaction of primers to detect the marked mRNA with the endogenous mRNAs.
- table S7. Mean, Fano factor, and CV of the RNA molecule copy number distributions.

**Other Supplementary Material for this manuscript includes the following:**  
(available at [advances.sciencemag.org/cgi/content/full/3/7/e1700006/DC1](https://advances.sciencemag.org/cgi/content/full/3/7/e1700006/DC1))

- data file S1 (Microsoft Excel format).  $C_t$  values for one of the replicate experiments of pooled strains in the MGC experiment.
- data file S2 (Microsoft Excel format). Time courses in the replicate measurements.
- data file S3 (Microsoft Excel format). mRNA (relative) levels and decay rates.
- data file S4 (Microsoft Excel format). Time courses for *YJR139C* and *YDR032C* mRNAs.

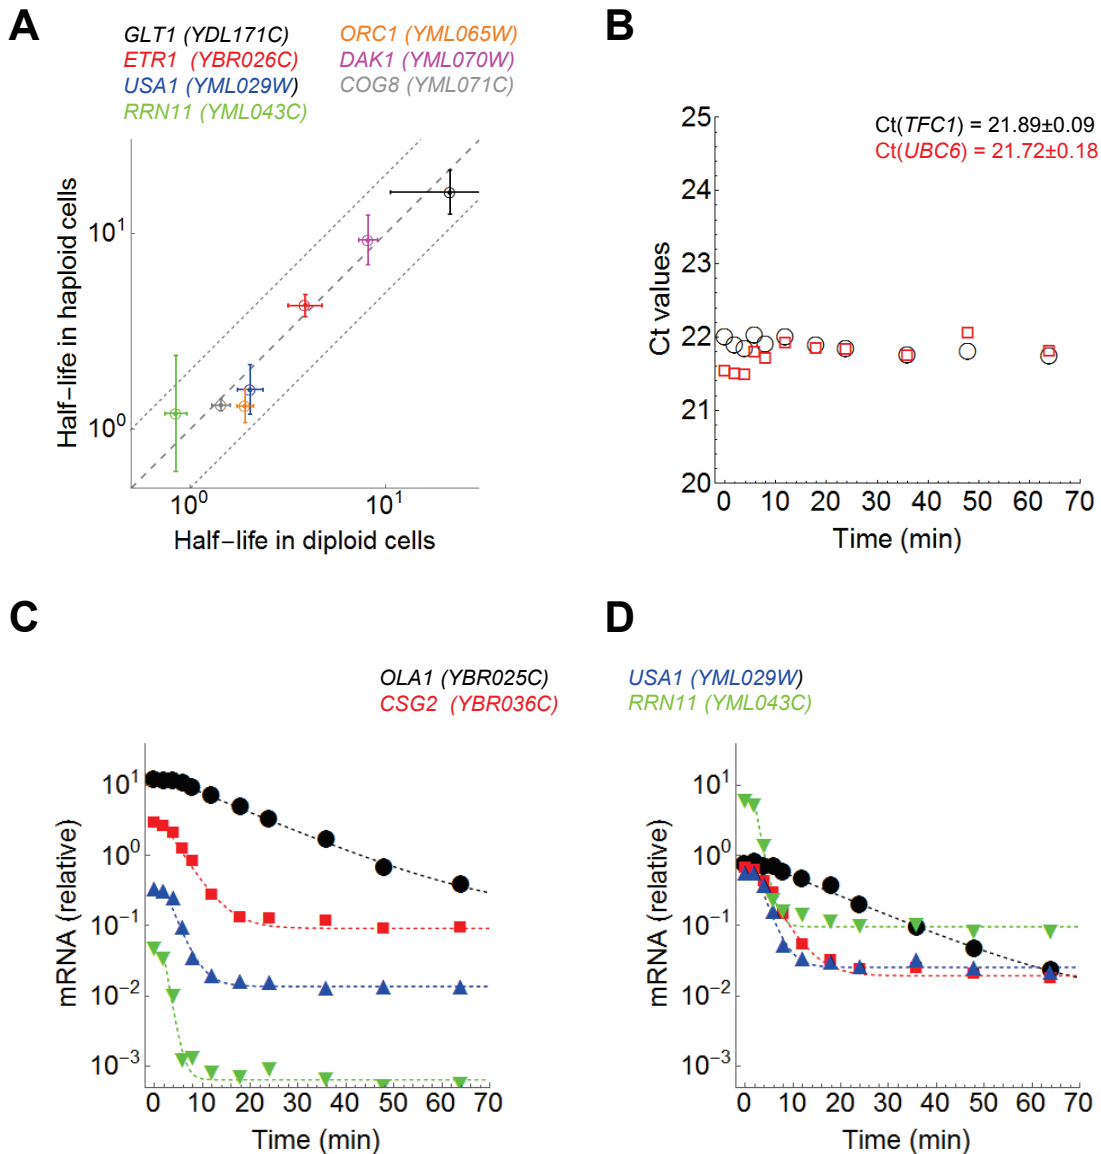

**fig. S1. The cell ploidy and the choice of reference mRNAs have no impact on measured half-lives.** (A) Half-lives of mRNAs in haploid and diploid cells measured by MGC. The gray dashed line indicates the expected equality of the two half-lives and the dotted line a two-fold deviation from the equality. (B) The Ct values of *TFC1* and *UBC6* during the time course display low variability ( $CV_{TFC1} = 0.4\%$  and  $CV_{UBC6} = 0.8\%$ ). (C) mRNAs decay time courses with *TFC1* and *UBC6* used as gene of reference. The following half-lives were fitted: *YBR025C* (*OLA1*): 11.5, *YBR036C* (*CSG2*): 2.6 min, *YML029W* (*USA1*): 1.7 and *YML043C* (*RRN11*): 0.7 min. (D) mRNA decay time courses with the respective endogenous mRNA levels used as reference. The following half-lives were fitted: *YBR025C* (*OLA1*): 10.5 min, *YBR036C* (*CSG2*): 2.5 min, *YML029W* (*USA1*): 1.5 and *YML043C* (*RRN11*): 0.8 min.

**A**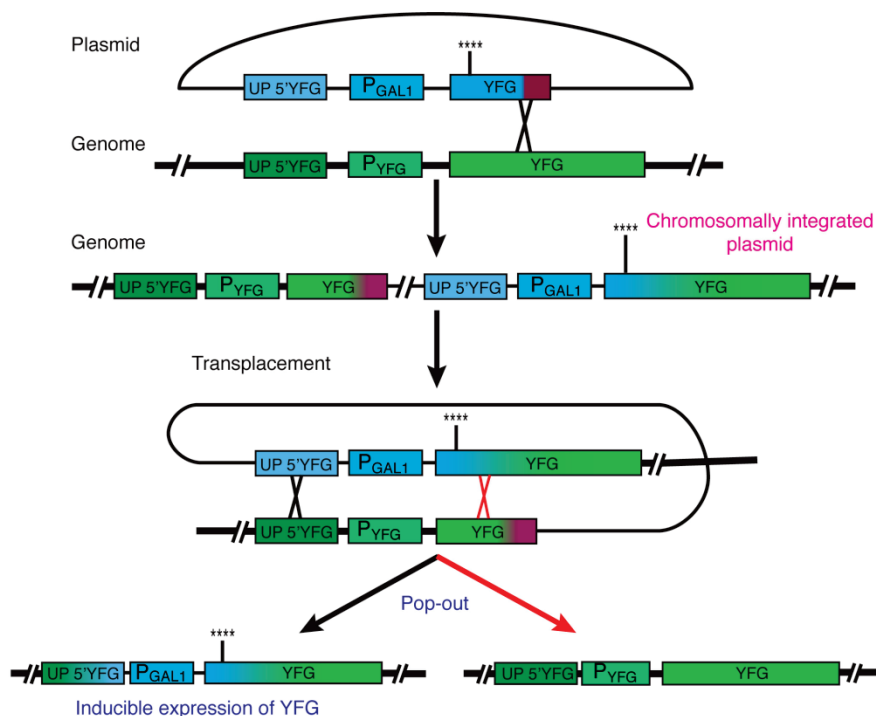**B**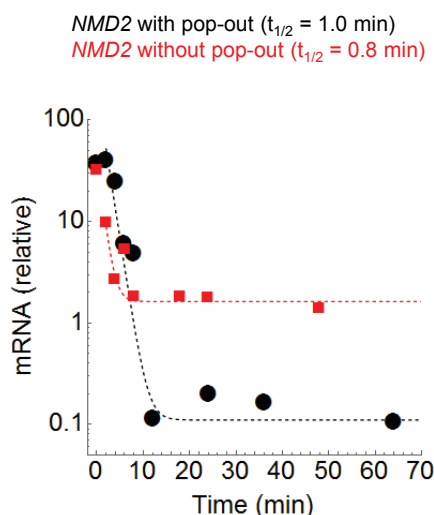**C**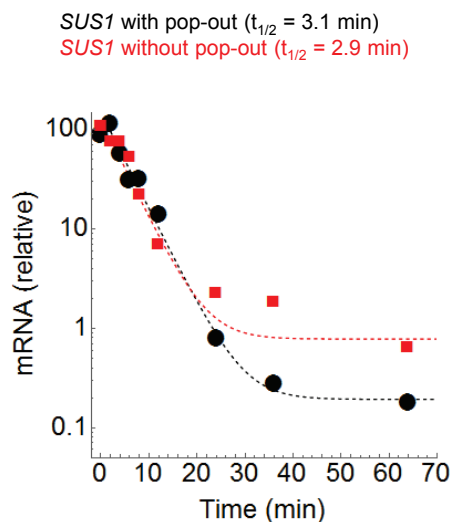

**fig. S2. Pop-out of the chromosomally integrated plasmid is dispensable for half-life estimation of mature mRNA.** The half-lives of mRNAs ( $\pm$  standard error of the fitting) were determined as described in Bonde *et al.* (A) After homologous recombination, the plasmid is integrated into the chromosome and the promoter of the gene is replaced. The plasmid can be popped out by transplacement, so that only the replaced promoter ( $P_{GAL1}$ ) remains in the chromosome. Negative selection on FOA plates permits identification of strains with popped-out plasmid (blue text). (B) Time course of mRNA decay of *SUS1* with (blue) and without (red) popped-out plasmid. (C) Time course of mRNA decay of *NMD2* with (blue) and without (red) popped-out of the plasmid.

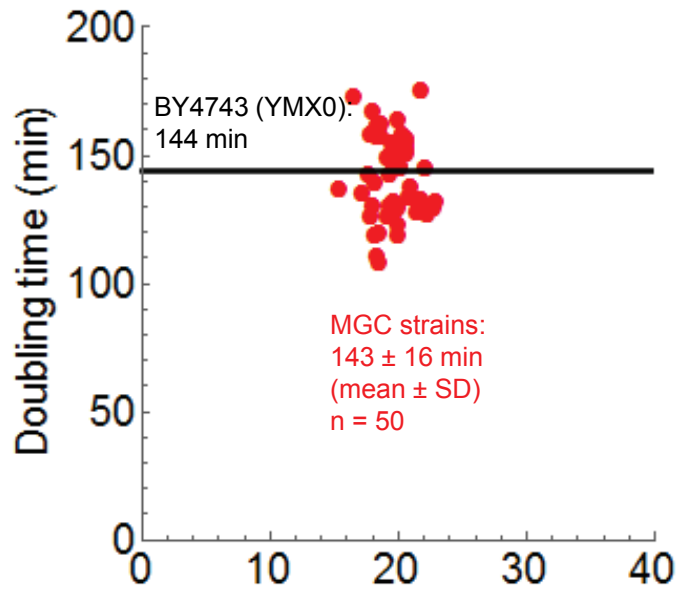

**fig. S3.** The doubling time of the MGC strains (red dots) is similar to that of the parent diploid strain (black line). The doubling times were measured in synthetic complete (SC) medium (2% raffinose, 0.005% glucose).

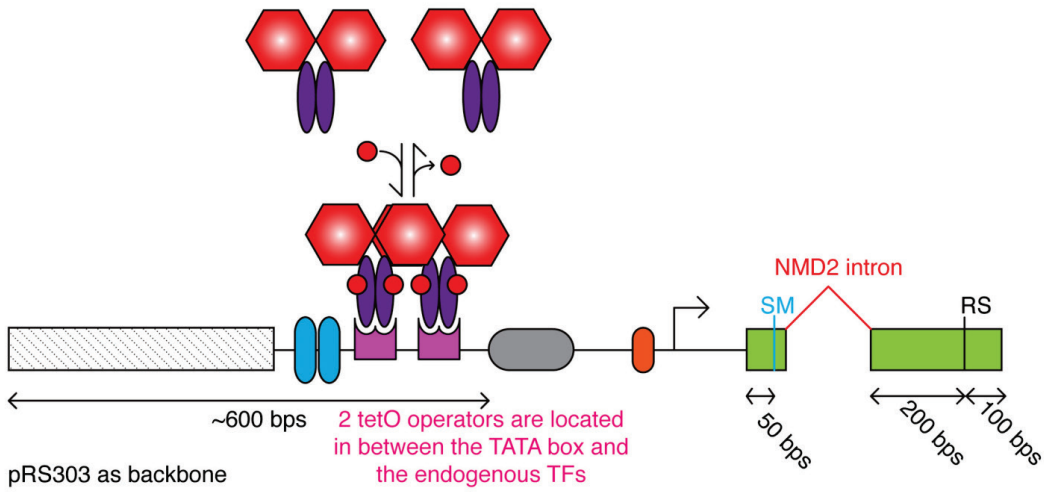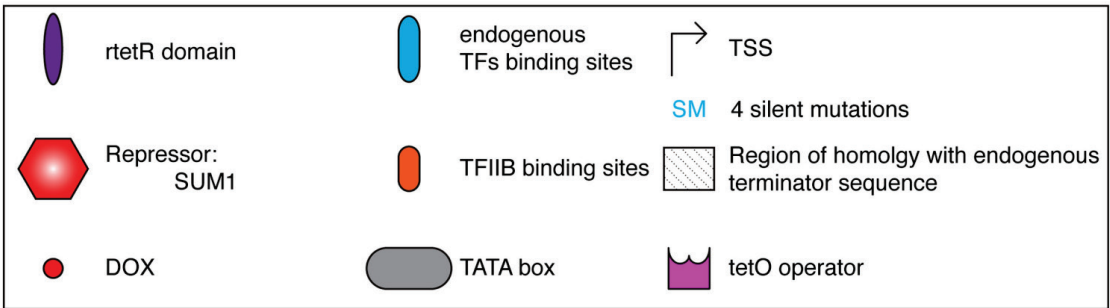

fig. S4. Insertional promoter strategy.

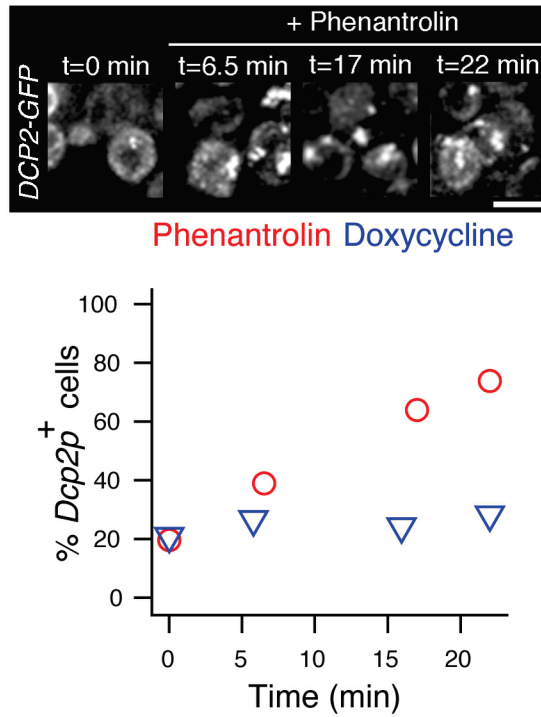

**fig. S5. Phenanthroline increases the number of P bodies.** Top. Representative images of *DCP2-GFP* cells before and after addition of phenanthroline to the media); scale bar: 2  $\mu$ m. Bottom. Changes in the percentage of *Dcp2p* positive cells after addition of phenanthroline (red) or doxycycline to the media (blue).

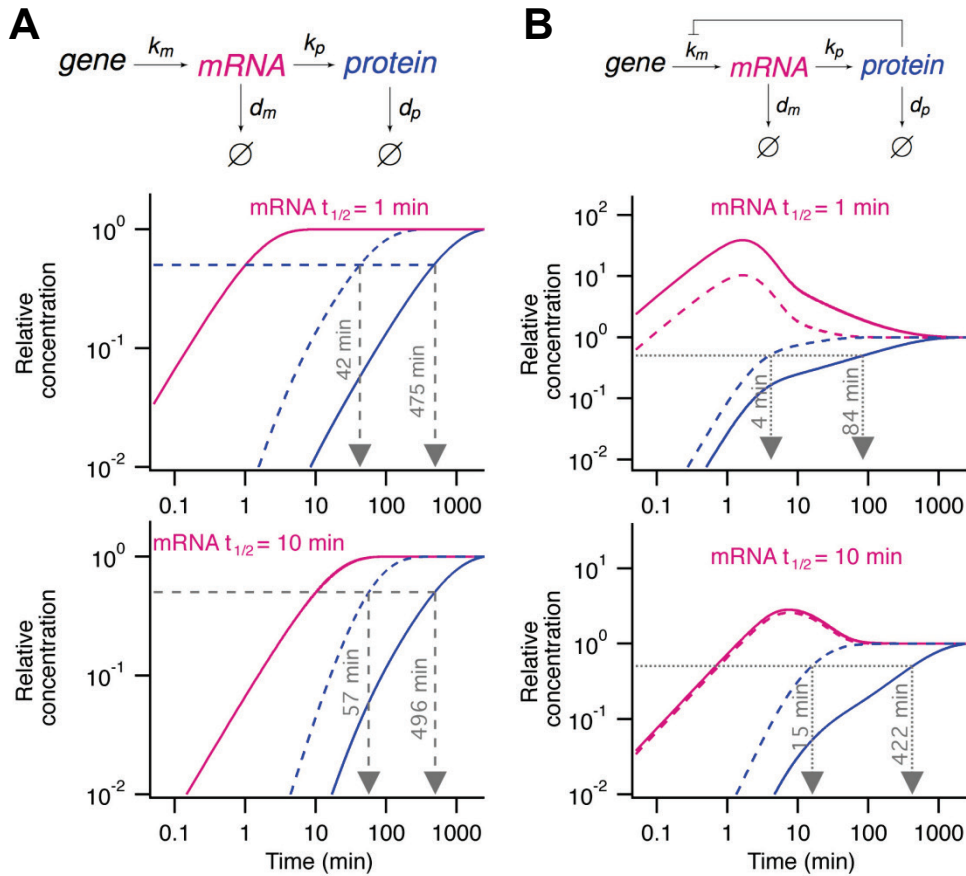

**fig. S6. mRNA half-life has a major impact on response time of a protein in a negative feedback loop.** (A) The response time of the protein as a function of mRNA half-life ( $t_{1/2}=1$  and 10 min in the middle and bottom panels, respectively) when the protein half-life is 40 min (dashed blue line) or 8 hours (plain blue line). Parameter values are the same as described for the feedback loop without Hill function. (B) The response time of negative feedback loops as a function of mRNA half-life ( $t_{1/2}=1$  and 10 min in the top and bottom panels, respectively) when the protein half-life is 40 min (dashed blue line) or 8 hours (plain blue line). The mRNA and protein concentrations are normalized to their steady state level. The response time is defined as the time necessary to reach half of the steady-state level (grey arrow). For the model of the negative feedback loop, the following parameters were used: *mRNA* is transcribed at  $k_m = 10$  nM.min<sup>-1</sup> (top) and 1 nM.min<sup>-1</sup> (bottom), and degraded at  $d_m = 0.69$  min<sup>-1</sup> (top) and 0.069 min<sup>-1</sup> (bottom) to reflect half-lives of 1 and 10 min, respectively. *mRNA* is translated into *protein* at  $k_p = 100$  nM.min<sup>-1</sup>, which is degraded at rate  $d_p = 0.017$  min<sup>-1</sup> (blue dashed line) or  $d_p = 0.0014$  min<sup>-1</sup> (blue plain line). The response of the promoter to the repressor protein is described by a Hill-type function with  $K = 10$  nM,  $n = 2$ .



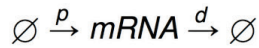

**A**

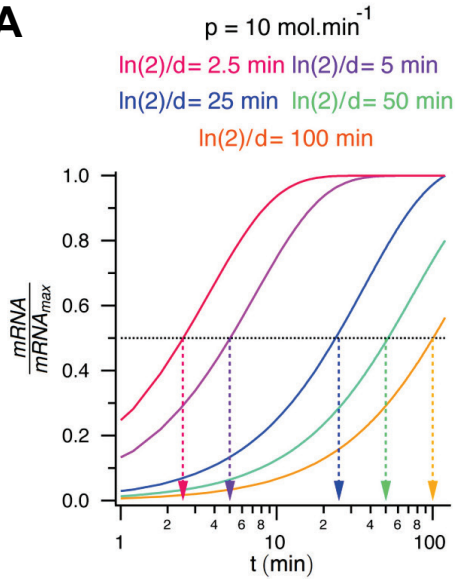

**B**

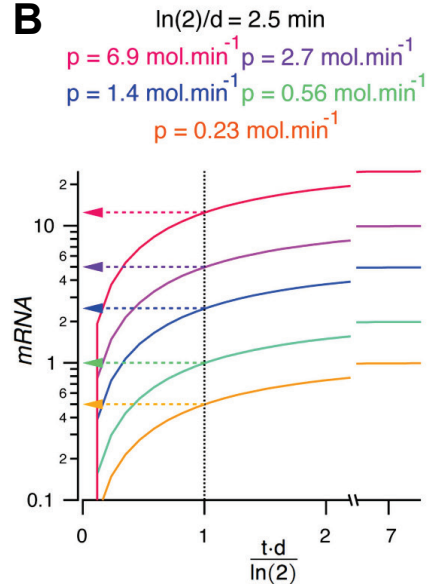

**fig. S7. Degradation rates and not synthesis rates affect the response time.** Both these rates determine the steady-state mRNA level ( $mRNA_{max}$ ). **(A)** The time needed to reach half of  $mRNA_{max}$  (response time) solely depends on the decay rate,  $d$ , of the mRNA. In other words, the shorter the mRNA half-life is, the faster the mRNA reaches its steady state level. **(B)** In contrast the synthesis rate,  $p$ , does not influence the response time of gene expression upon induction.

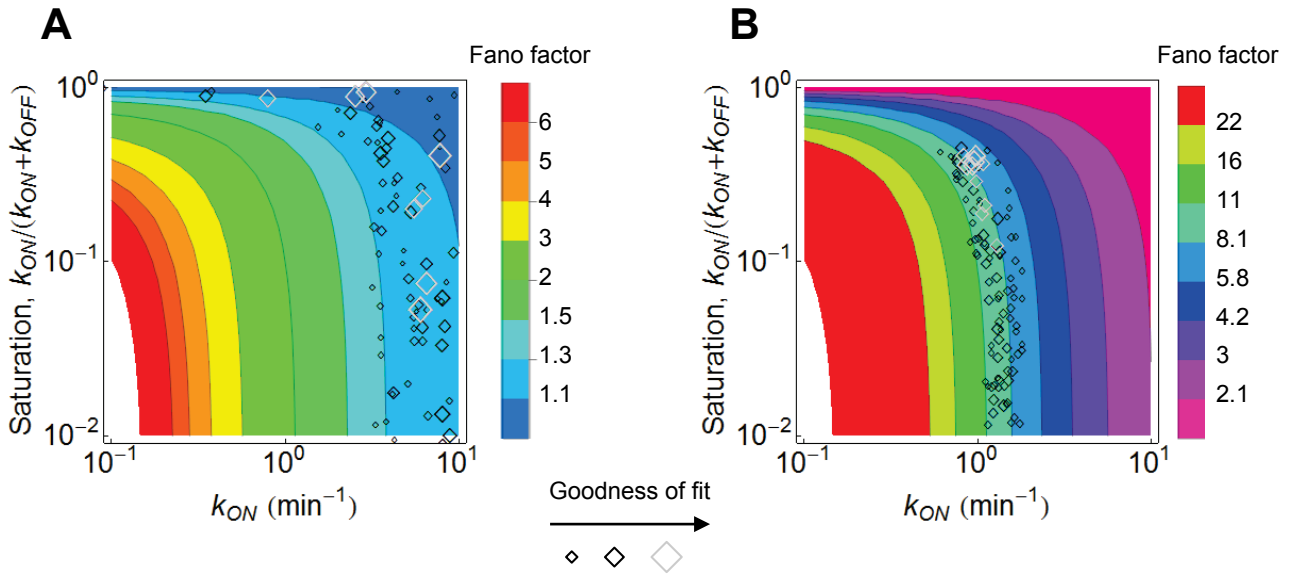

**fig. S8. Parameter estimation of the two state-model to fit the *USA1* RNA copy number distributions.** The size of symbol (diamond) is inversely proportional to the SSE (sum of squared residuals) and thus, reflects the goodness of the fit in the two-dimensional parameter space. The ten best fits are denoted by gray color. The Fano factor of the distribution is closely related to the goodness of the fit. The Fano factor is the ratio of the variance to the mean, and the Poisson distribution has a Fano factor equal to 1. The value of the decay rate constant is taken from the MGC experiment. The contour plot shows the Fano factor as a function of the  $k_{on}$  and saturation,  $k_{ON}/(k_{ON} + k_{OFF})$ .  $k_{Tr}$  was calculated to match the mean of the measured mRNA copy number. The random parameter values were obtained as follows. First, the logarithms of  $k_{ON}$  and  $k_{Tr}$  were randomly generated from a uniform distribution, between 0.001 and 10 min<sup>-1</sup>, and between  $0.83 \langle mRNA \rangle k_{dec}$  and 1200, respectively.  $\langle mRNA \rangle$  is the mean value of the measured distribution. Last,  $k_{OFF}$  was randomly generated so that the predicted Fano factor was in the 2.25fold range around the Fano factor of the experimental distribution. **(A)** *USA1* (endogenous promoter). The Fano factor of the experimental distribution is 1.3 (see table S7), which indicates it is similar to a Poisson distribution. **(B)** *USA1* (substitutional promoter).

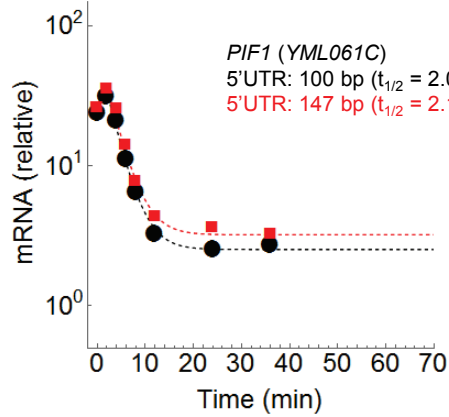

**fig. S9. Impact of 5'UTR length on the decay profiles of mRNAs with varying 5'UTR lengths (right).** The fitted half-lives ( $\pm$  standard error of the fitting) are indicated at the top of the panels. The length of 5'UTR of *YML061C* is 63 bp in the Nagalakshmi data set and  $140 \pm 7$  bp in the Pelechano data set. The constructs with the two different cloned 5'UTR lengths (100 and 147 bp) yielded almost identical steady-state level and decay rates.

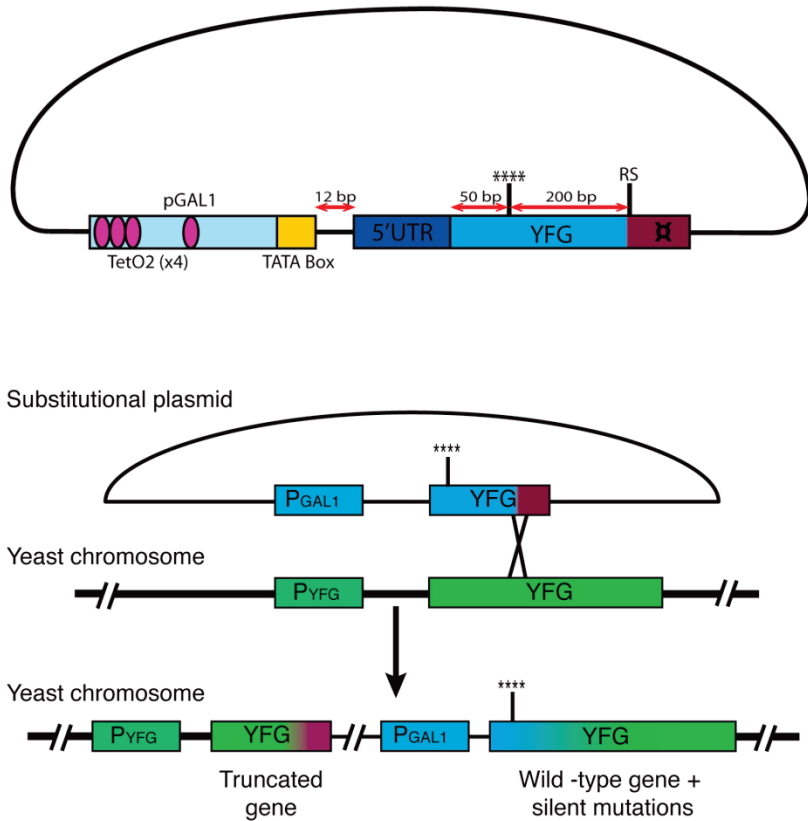

**fig. S10. Design of the plasmids with the substitutable promoters and the strategy for chromosomal integration.**

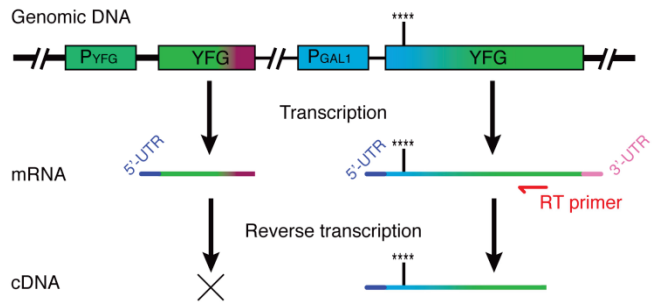

**fig. S11. Reverse transcription strategy.**

**table S1. Plasmid list.** tetO2 refers to the version 2 of the *tet* operator.

| Common name  | Systematic name | Plasmid number | Plasmid description                                                                                                |
|--------------|-----------------|----------------|--------------------------------------------------------------------------------------------------------------------|
| tTA          | -               | pMG013         | pRS305-BstZI-P <sub>CLN3</sub> -XbaI-tTA-BamHI                                                                     |
| rTetR.SUM1   | -               | pSV_238        | pRS303-SalI-P <sub>tet2</sub> .rTetR.SUM1.Tact1-NotI                                                               |
| rTetR.SSN6   | -               | pSV_237        | pRS303-SalI-P <sub>tet2</sub> .rTetR.SSN6.Tact1-NotI                                                               |
| <i>OLA1</i>  | YBR025C         | pSV_228        | pRS306-KpnI-Fig1-XhoI-Tgal7-AvrII-[tetO2]4inP <sub>gal1</sub> -BglII-5'UTR_YBR025C_4silmut_RS_BamHI-EcoRI-Ter-NotI |
| <i>ETR1</i>  | YBR026C         | pSV_229        | pRS306-KpnI-Fig1-XhoI-Tgal7-AvrII-[tetO2]4inP <sub>gal1</sub> -BglII-5'UTR_YBR026C_4silmut_RS_BamHI-EcoRI-Ter-NotI |
| <i>HMT1</i>  | YBR034C         | pSV_232        | pRS306-KpnI-Fig1-XhoI-Tgal7-AvrII-[tetO2]4inP <sub>gal1</sub> -BglII-5'UTR_YBR034C_4silmut_RS_BamHI-EcoRI-Ter-NotI |
| <i>CSG2</i>  | YBR036C         | pSV_233        | pRS306-KpnI-Fig1-XhoI-Tgal7-AvrII-[tetO2]4inP <sub>gal1</sub> -BglII-5'UTR_YBR036C_4silmut_RS_BamHI-SphI-Ter-NotI  |
| <i>ZTA1</i>  | YBR046C         | pSV_235        | pRS306-KpnI-Fig1-XhoI-Tgal7-AvrII-[tetO2]4inP <sub>gal1</sub> -BamHI-5'UTR_YBR046C_4silmut_RS_MfeI-SphI-Ter-NotI   |
| <i>REG2</i>  | YBR050C         | pSV_236        | pRS306-KpnI-Fig1-XhoI-Tgal7-AvrII-[tetO2]4inP <sub>gal1</sub> -BglII-5'UTR_YBR050C_4silmut_RS_BamHI-EcoRI-Ter-NotI |
| <i>RFS1</i>  | YBR052C         | pCP001         | pRS306-KpnI-Fig1-XhoI-Tgal7-AvrII-[tetO2]4inP <sub>gal1</sub> -BglII-5'UTR_YBR052C_4silmut_RS_BamHI-EcoRI-Ter-NotI |
| <i>NRG2</i>  | YBR066C         | pCP002         | pRS306-KpnI-Fig1-XhoI-Tgal7-AvrII-[tetO2]4inP <sub>gal1</sub> -BglII-5'UTR_YBR066C_4silmut_RS_BamHI-EcoRI-Ter-NotI |
| <i>MIS1</i>  | YBR084W         | pCP003         | pRS306-KpnI-Fig1-XhoI-Tgal7-AvrII-[tetO2]4inP <sub>gal1</sub> -BglII-5'UTR_YBR084W_4silmut_RS_BamHI-SphI-Ter-NotI  |
| <i>PGK1</i>  | YCR012W         | pEC006         | pRS306-KpnI-Fig1-XhoI-Tgal7-AvrII-[tetO2]4inP <sub>gal1</sub> -SphI-5'UTR_YCR012W_4silmut_RS_MfeI-EcoRI-Ter-NotI   |
| <i>GLT1</i>  | YDL171C         | pSV_225        | pRS306K-pnI-Fig1-XhoI-Tgal7-AvrII-[tetO2]4inP <sub>gal1</sub> -BamHI-5'UTR_GLT1_4silmut_RS_SpeI-ClaI-Ter-NotI      |
| <i>GLT1</i>  | YDL171C         | pSV_248        | pRS306-BamHI-UP-GLT1-TFs-[tetO2]2-TATA_GLT1_4silmut_NMD2intron_RS_SpeI-NotI                                        |
| <i>SUC2</i>  | YIL162W         | pSV_224        | pRS306-KpnI-Fig1-XhoI-Tgal7-AvrII-[tetO2]4inP <sub>gal1</sub> -BglII-5'UTR_SUC2_4silmut_RS_BamHI-EcoRI-Ter-NotI    |
| <i>GAL2</i>  | YLR081W         | pSV_222        | pRS306-KpnI-Fig1-XhoI-Tgal7-AvrII-[tetO2]4inP <sub>gal1</sub> -BglII-5'UTR_GAL2_4silmut_RS_ClaI-EcoRI-Ter-NotI     |
| <i>USA1</i>  | YML029W         | pSM001         | pRS306-KpnI-Fig1-XhoI-Tgal7-AvrII-[tetO2]4inP <sub>gal1</sub> -BglII-5'UTR_YML029W_4silmut_RS_ClaI-EcoRI-Ter-NotI  |
| <i>USA1</i>  | YML029W         | pSV_243        | pRS306-SpeI-UP-YML029W-TFs-[tetO2]2-TATA_YML029W_4silmut_NMD2intron_RS_BglII-NotI                                  |
| <i>USA1</i>  | YML029W         | pSV_247        | pRS306-SpeI-UP-YML029W-TFs-[tetO2]2-TATA_YML029W_4silmut_RS_BglII-NotI                                             |
| <i>NDC1</i>  | YML031W         | pSV_203        | pRS306-KpnI-Fig1-XhoI-Tgal7-AvrII-[tetO2]4inP <sub>gal1</sub> -BglII-5'UTR_YML031W_4silmut_RS_BamHI-EcoRI-Ter-NotI |
| <i>RAD52</i> | YML032C         | pSV_213        | pRS306-KpnI-Fig1-XhoI-Tgal7-AvrII-[tetO2]4inP <sub>gal1</sub> -BglII-5'UTR_YML032C_4silmut_RS_BamHI-EcoRI-Ter-NotI |
| <i>RRN11</i> | YML043C         | pSM002         | pRS306-KpnI-Fig1-XhoI-Tgal7-AvrII-[tetO2]4inP <sub>gal1</sub> -BglII-5'UTR_YML043C_4silmut_RS_MfeI-EcoRI-Ter-NotI  |
| <i>PRP39</i> | YML046W         | pSM003         | pRS306-KpnI-Fig1-XhoI-Tgal7-AvrII-[tetO2]4inP <sub>gal1</sub> -BglII-5'UTR_YML046W_4silmut_RS_MfeI-EcoRI-Ter-NotI  |
| <i>GSF2</i>  | YML048W         | pSV_209        | pRS306-KpnI-Fig1-XhoI-Tgal7-AvrII-[tetO2]4inPgal1-BglII-5'UTR_YML048W_4silmut_RS_BamHI-EcoRI-Ter-NotI              |
| <i>AIM32</i> | YML050W         | pSV_266        | pRS306KpnI-Fig1-XhoI-Tgal7-AvrII-[tetO2]4inPgal1-BglII-5'UTR_YML050W_4silmut_RS_BamHI-EcoRI-Ter                    |
| <i>GAL80</i> | YML051W         | pSV_267        | pRS306KpnI-Fig1-XhoI-Tgal7-AvrII-[tetO2]4inPgal1-BamHI-5'UTR_YML051W_4silmut_RS_SpeI-SphI-Ter-NotI                 |

| Common name    | Systematic name | Plasmid number | Plasmid description                                                                                                      |
|----------------|-----------------|----------------|--------------------------------------------------------------------------------------------------------------------------|
| <i>CYB2</i>    | YML054C         | pEC007         | pRS306-KpnI-Fig1-XhoI-Tgal7-AvrII-[tetO2]4inP <sub>gal1</sub> -BglII-5'UTR_YML054C_4silmut_RS_MfeI-EcoRI-Ter-NotI        |
| <i>NTE1</i>    | YML059C         | pSV_268        | pRS306KpnI-Fig1-XhoI-Tgal7-AvrII-[tetO2]4inPgal1-BamHI-5'UTR_YML059C_4silmut_RS_BglII-SpeI-Ter-NotI                      |
| <i>OGG1</i>    | YML060W         | pSV_205        | pRS306-KpnI-Fig1-XhoI-Tgal7-AvrII-[tetO2]4inP <sub>gal1</sub> -BglII-5'UTR_YML060W_4silmut_RS_BamHI-EcoRI-Ter-NotI       |
| <i>PIF1</i>    | YML061C         | pEC009         | pRS306-KpnI-Fig1-XhoI-Tgal7-AvrII-[tetO2]4inP <sub>gal1</sub> -BglII-5'UTR_YML061C_4silmut_RS_PmeI-EcoRI-Ter-NotI        |
| <i>MFT1</i>    | YML062C         | pSV_210        | pRS306-KpnI-Fig1-XhoI-Tgal7-AvrII-[tetO2]4inP <sub>gal1</sub> -BglII-5'UTR_YML062C_4silmut_RS_BamHI-EcoRI-Ter-NotI       |
| <i>ORC1</i>    | YML065W         | pSM004         | pRS306-KpnI-Fig1-XhoI-Tgal7-AvrII-[tetO2]4inP <sub>gal1</sub> -BglII-5'UTR_YML065W_4silmut_RS_MfeI-EcoRI-Ter-NotI        |
| <i>ERV41</i>   | YML067C         | pSV_219        | pRS306-KpnI-Fig1-XhoI-Tgal7-AvrII-[tetO2]4inP <sub>gal1</sub> -BglII-5'UTR_YML067C_4silmut_RS_BamHI-EcoRI-Ter-NotI       |
| <i>DAK1</i>    | YML070W         | pSV_207        | pRS306-KpnI-Fig1-XhoI-Tgal7-AvrII-[tetO2]4inP <sub>gal1</sub> -BglII-5'UTR_YML070W_4silmut_RS_BamHI-EcoRI-Ter-NotI       |
| <i>COG8</i>    | YML071C         | pEC005         | pRS306-KpnI-Fig1-XhoI-Tgal7-AvrII-[tetO2]4inP <sub>gal1</sub> -BglII-5'UTR_YML071C_4silmut_RS_MfeI-EcoRI-Ter-NotI        |
| <i>WAR1</i>    | YML076C         | pSV_218        | pRS306-KpnI-Fig1-XhoI-Tgal7-AvrII-[tetO2]4inP <sub>gal1</sub> -BamHI-5'UTR_YML076C_4silmut_RS_SpeI-SphI-Ter-NotI         |
| <i>DUS1</i>    | YML080W         | pSM005         | pRS306-KpnI-Fig1-XhoI-Tgal7-AvrII-[tetO2]4inP <sub>gal1</sub> -BglII-5'UTR_YML080W_4silmut_RS_MfeI-EcoRI-Ter-NotI        |
| <i>TDA9</i>    | YML081W         | pSV_307        | pRS306-KpnI-Fig1-XhoI-Tgal7-AvrII-[tetO2]4inP <sub>gal1</sub> -BglII-5'UTR_YML081W_4silmut_RS_BamHI-SphI-Ter-NotI        |
| <i>ALO1</i>    | YML086C         | pSV_217        | pRS306-KpnI-Fig1-XhoI-Tgal7-AvrII-[tetO2]4inP <sub>gal1</sub> -BamHI-5'UTR_YML086C_4silmut_RS_SpeI-SphI-Ter-NotI         |
| <i>AIM33</i>   | YML087C         | pSV_269        | pRS306KpnI-Fig1-XhoI-Tgal7-AvrII-[tetO2]4inPgal1-BglII-5'UTR_YML087C_4silmut_RS_SpeI(WT)-EcoRI-Ter-NotI                  |
| <i>UFO1</i>    | YML088W         | pSV_208        | pRS306-KpnI-Fig1-XhoI-Tgal7-AvrII-[tetO2]4inP <sub>gal1</sub> -BglII-5'UTR_YML088W_4silmut_RS_BamHI-EcoRI-Ter-NotI       |
| <i>RPM2</i>    | YML091C         | pSV_270        | pRS306KpnI-Fig1-XhoI-Tgal7-AvrII-[tetO2]4inPgal1-EcoRI-5'UTR_YML091C_4silmut_RS_SpeI-SphI-Ter-NotI                       |
| <i>UTP14</i>   | YML093W         | pSV_206        | pRS306-KpnI-Fig1-XhoI-Tgal7-AvrII-[tetO2]4inP <sub>gal1</sub> -BglII-5'UTR_YML093W_4silmut_RS_BamHI-SphI-Ter-NotI        |
| <i>YML096W</i> | YML096W         | pSV_271        | pRS306KpnI-Fig1-XhoI-Tgal7-AvrII-[tetO2]4inPgal1-BglII-5'UTR_YML096W_4silmut_RS_BamHI-EcoRI-Ter-NotI                     |
| <i>VPS9</i>    | YML097C         | pSV_215        | pRS306-KpnI-Fig1-XhoI-Tgal7-AvrII-[tetO2]4inP <sub>gal1</sub> -BglII-5'UTR_YML097C_4silmut_RS_BamHI-EcoRI-Ter-NotI       |
| <i>ARG81</i>   | YML099C         | pSV_214        | pRS306-KpnI-Fig1-XhoI-Tgal7-AvrII-[tetO2]4inP <sub>gal1</sub> -BglII-5'UTR_YML099C_4silmut_RS_BamHI-EcoRI-Ter-NotI       |
| <i>TSL1</i>    | YML100W         | pSV_272        | pRS306KpnI-Fig1-XhoI-Tgal7-AvrII-[tetO2]4inPgal1-BglII-5'UTR_YML100W_4silmut_RS_BamHI-EcoRI-Ter-NotI                     |
| <i>CAC2</i>    | YML102W         | pEC008         | pRS306-KpnI-Fig1-XhoI-Tgal7-AvrII-[tetO2]4inP <sub>gal1</sub> -BglII-5'UTR_YML102W_4silmut_RS_MfeI-EcoRI-Ter-NotI        |
| <i>NUP188</i>  | YML103C         | pSV_273        | pRS306KpnI-Fig1-XhoI-Tgal7-AvrII-[tetO2]4inPgal1-BamHI-5'UTR_YML103C_4silmut_RS_SpeI-SphI-Ter-NotI                       |
| <i>PML39</i>   | YML107C         | pSV_274        | pRS306KpnI-Fig1-XhoI-Tgal7-AvrII-[tetO2]4inPgal1-BamHI-5'UTR_YML107C_4silmut_RS_SpeI-SphI-Ter-NotI                       |
| <i>TAF8</i>    | YML114C         | pEC003         | pRS306-KpnI-Fig1-XhoI-Tgal7-AvrII-[tetO2]4inP <sub>gal1</sub> -BglII-5'UTR(100bp)_YML114C_4silmut_RS_BseRI-SphI-Ter-NotI |
| <i>TAF8</i>    | YML114C         | pEC004         | pRS306-KpnI-Fig1-XhoI-Tgal7-AvrII-[tetO2]4inP <sub>gal1</sub> -BglII-5'UTR(181bp)_YML114C_4silmut_RS_BseRI-SphI-Ter-NotI |
| <i>VAN1</i>    | YML115C         | pSV_211        | pRS306-KpnI-Fig1-XhoI-Tgal7-AvrII-[tetO2]4inP <sub>gal1</sub> -BglII-5'UTR_YML115C_4silmut_RS_BamHI-EcoRI-Ter-NotI       |

| <b>Common name</b> | <b>Systematic name</b> | <b>Plasmid number</b> | <b>Plasmid description</b>                                                                                         |
|--------------------|------------------------|-----------------------|--------------------------------------------------------------------------------------------------------------------|
| <i>ATRI</i>        | YML116W                | pSM006                | pRS306-KpnI-Fig1-XhoI-Tgal7-AvrII-[tetO2]4inP <sub>gal1</sub> -BglII-5'UTR_YML116W_4silmut_RS_MfeI-EcoRI-Ter-NotI  |
| <i>PHO84</i>       | YML123C                | pSV_212               | pRS306-KpnI-Fig1-XhoI-Tgal7-AvrII-[tetO2]4inP <sub>gal1</sub> -BglII-5'UTR_YML123C_4silmut_RS_BamHI-EcoRI-Ter-NotI |
| <i>RSC9</i>        | YML127W                | pSV_204               | pRS306-KpnI-Fig1-XhoI-Tgal7-AvrII-[tetO2]4inP <sub>gal1</sub> -BglII-5'UTR_YML127W_4silmut_RS_BamHI-EcoRI-Ter-NotI |
| <i>ERO1</i>        | YML130C                | pSM007                | pRS306-KpnI-Fig1-XhoI-Tgal7-AvrII-[tetO2]4inP <sub>gal1</sub> -BglII-5'UTR_YML130C_4silmut_RS_MfeI-EcoRI-Ter-NotI  |
| <i>ADH2</i>        | YMR303C                | pSV_226               | pRS306-KpnI-Fig1-XhoI-Tgal7-AvrII-[tetO2]4inP <sub>gal1</sub> -BglII-5'UTR_ADH2_4silmut_RS_BamHI-EcoRI-Ter-NotI    |



**table S2. Strain list.**

| Strain number |        | Common name  | Systematic name | Ploidy | Silent mutations | Promoter       | Marker    |
|---------------|--------|--------------|-----------------|--------|------------------|----------------|-----------|
| YMX0          |        |              | 4x tTA          | H      | BY4741           | -              | -LEU      |
| YMX00         |        |              | 4x tTA          | D      | BY4743           | -              | -LEU      |
| YMX3          | YMX4   | <i>OLA1</i>  | YBR025C         | D      | +                | Substitutional | -LEU -URA |
| YMX5          | YMX6   | <i>ETR1</i>  | YBR026C         | D      | +                | Substitutional | -LEU -URA |
| YMX151        | YMX152 | <i>HMT1</i>  | YBR034C         | D      | +                | Substitutional | -LEU -URA |
| YMX9          | YMX10  | <i>CSG2</i>  | YBR036C         | D      | +                | Substitutional | -LEU -URA |
| YMX153        | YMX154 | <i>ZTA1</i>  | YBR046C         | D      | +                | Substitutional | -LEU -URA |
| YMX13         | YMX14  | <i>REG2</i>  | YBR050C         | D      | +                | Substitutional | -LEU -URA |
| YMX155        | YMX156 | <i>RFS1</i>  | YBR052C         | D      | +                | Substitutional | -LEU -URA |
| YMX17         | YMX18  | <i>NRG2</i>  | YBR066C         | D      | +                | Substitutional | -LEU -URA |
| YMX157        | YMX158 | <i>MIS1</i>  | YBR084W         | D      | +                | Substitutional | -LEU -URA |
| YMX159        | YMX160 | <i>PGK1</i>  | YCR012W         | D      | +                | Substitutional | -LEU -URA |
| YMX161        | YMX162 | <i>GLT1</i>  | YDL171C         | D      | +                | Substitutional | -LEU -URA |
| YMX163        | YMX164 | <i>SUC2</i>  | YIL162W         | D      | +                | Substitutional | -LEU -URA |
| YMX27         | YMX28  | <i>GAL2</i>  | YLR081W         | D      | +                | Substitutional | -LEU -URA |
| YMX29         | YMX30  | <i>USA1</i>  | YML029W         | D      | +                | Substitutional | -LEU -URA |
| YMX31         | YMX32  | <i>NDC1</i>  | YML031W         | D      | +                | Substitutional | -LEU -URA |
| YMX33         | YMX34  | <i>RAD52</i> | YML032C         | D      | +                | Substitutional | -LEU -URA |
| YMX35         | YMX36  | <i>RRN11</i> | YML043C         | D      | +                | Substitutional | -LEU -URA |
| YMX165        | YMX166 | <i>PRP39</i> | YML046W         | D      | +                | Substitutional | -LEU -URA |
| YMX39         | YMX40  | <i>GSF2</i>  | YML048W         | D      | +                | Substitutional | -LEU -URA |
| YMX41         | YMX42  | <i>CYB2</i>  | YML054C         | D      | +                | Substitutional | -LEU -URA |
| YMX43         | YMX44  | <i>OGG1</i>  | YML060W         | D      | +                | Substitutional | -LEU -URA |
| YMX173        | YMX174 | <i>PIF1</i>  | YML061C         | D      | +                | Substitutional | -LEU -URA |
| YMX175        | YMX176 | <i>MFT1</i>  | YML062C         | D      | +                | Substitutional | -LEU -URA |
| YMX49         | YMX50  | <i>ORC1</i>  | YML065W         | D      | +                | Substitutional | -LEU -URA |
| YMX51         | YMX52  | <i>ERV41</i> | YML067C         | D      | +                | Substitutional | -LEU -URA |
| YMX53         | YMX54  | <i>DAK1</i>  | YML070W         | D      | +                | Substitutional | -LEU -URA |
| YMX55         | YMX56  | <i>COG8</i>  | YML071C         | D      | +                | Substitutional | -LEU -URA |
| YMX57         | YMX58  | <i>WAR1</i>  | YML076C         | D      | +                | Substitutional | -LEU -URA |
| YMX59         | YMX60  | <i>DUS1</i>  | YML080W         | D      | +                | Substitutional | -LEU -URA |
| YMX61         | YMX62  | <i>TDA9</i>  | YML081W         | D      | +                | Substitutional | -LEU -URA |
| YMX63         | YMX64  | <i>ALO1</i>  | YML086C         | D      | +                | Substitutional | -LEU -URA |
| YMX177        | YMX178 | <i>UFO1</i>  | YML088W         | D      | +                | Substitutional | -LEU -URA |
| YMX67         | YMX68  | <i>UTP14</i> | YML093W         | D      | +                | Substitutional | -LEU -URA |
| YMX69         | YMX70  | <i>VPS9</i>  | YML097C         | D      | +                | Substitutional | -LEU -URA |
| YMX71         | YMX72  | <i>ARG81</i> | YML099C         | D      | +                | Substitutional | -LEU -URA |
| YMX73         | YMX74  | <i>CAC2</i>  | YML102W         | D      | +                | Substitutional | -LEU -URA |
| YMX75         | YMX76  | <i>VAN1</i>  | YML115C         | D      | +                | Substitutional | -LEU -URA |
| YMX77         | YMX78  | <i>ATR1</i>  | YML116W         | D      | +                | Substitutional | -LEU -URA |

| Strain number |        | Common name    | Systematic name | Ploidy | Silent mutations | Promoter       | Marker     |
|---------------|--------|----------------|-----------------|--------|------------------|----------------|------------|
| YMX79         | YMX80  | <i>PHO84</i>   | YML123C         | D      | +                | Substitutional | -LEU -URA  |
| YMX81         | YMX82  | <i>RSC9</i>    | YML127W         | D      | +                | Substitutional | -LEU -URA  |
| YMX179        | YMX180 | <i>ERO1</i>    | YML130C         | D      | +                | Substitutional | -LEU -URA  |
| YMX181        | YMX182 | <i>ADH2</i>    | YMR303C         | D      | +                | Substitutional | -LEU -URA  |
| YMX87         | YMX88  | <i>GAL1</i>    | YBR020W         | D      | +                | Substitutional | -LEU -URA  |
| YMX89         | YMX90  | <i>USA1</i>    | YML029W         | H      | +                | Substitutional | -LEU -URA  |
| YMX91         | YMX92  | <i>ORC1</i>    | YML065W         | H      | -                | Substitutional | -LEU -URA  |
| YMX93         | YMX94  | <i>DAK1</i>    | YML070W         | H      | +                | Substitutional | -LEU -URA  |
| YMX97         | YMX98  | <i>ORC1</i>    | YML065W         | H      | +                | Substitutional | -LEU -URA  |
| YMX107        | YMX108 | <i>USA1</i>    | YML029W         | H      | +                | Substitutional | -LEU -URA  |
| YMX109        | YMX110 | <i>USA1</i>    | YML029W         | H      | -                | Substitutional | -LEU -URA  |
| YMX111        | YMX112 | <i>RRN11</i>   | YML043C         | H      | +                | Substitutional | -LEU -URA  |
| YMX113        | YMX114 | <i>RRN11</i>   | YML043C         | H      | -                | Substitutional | -LEU -URA  |
| YMX115        | YMX116 | <i>COG8</i>    | YML071C         | H      | +                | Substitutional | -LEU -URA  |
| YMX117        | YMX118 | <i>COG8</i>    | YML071C         | H      | -                | Substitutional | -LEU -URA  |
| YMX119        | YMX120 | <i>DAK1</i>    | YML070W         | H      | -                | Substitutional | -LEU -URA  |
| YMX121        | YMX122 | <i>GAL80</i>   | YML051W         | D      | +                | Substitutional | -LEU -URA  |
| YMX123        | YMX124 | <i>AIM33</i>   | YML087C         | D      | +                | Substitutional | -LEU, -HIS |
| YMX125        | YMX126 | <i>YML096W</i> | YML096W         | D      | +                | Substitutional | -LEU, -HIS |
| YMX127        | YMX128 | <i>TSL1</i>    | YML100W         | D      | +                | Substitutional | -LEU -URA  |
| YMX129        | YMX130 | <i>NUP188</i>  | YML103C         | D      | +                | Substitutional | -LEU -URA  |
| YMX131        | YMX132 | <i>PML39</i>   | YML107C         | D      | +                | Substitutional | -LEU -URA  |
| YMX101        | YMX102 | <i>USA1</i>    | YML029W         | H      | +                | Insertional    | -LEU, -HIS |
| YMX103        | YMX104 | <i>USA1</i>    | YML029W         | H      | +, no intron     | Insertional    | -LEU, -HIS |
| YMX105        | YMX106 | <i>GLT1</i>    | YDL171C         | H      | +                | Insertional    | -LEU, -HIS |
| YMX133        | YMX134 | <i>AIM32</i>   | YML050W         | D      | +                | Substitutional | -LEU -URA  |
| YMX135        | YMX136 | <i>NTE1</i>    | YML059C         | D      | +                | Substitutional | -LEU -URA  |
| YMX137        | YMX138 | <i>RPM2</i>    | YML091C         | D      | +                | Substitutional | -LEU -URA  |

**table S3. Cloned 5'UTR lengths of genes.**

| <b>Systematic name</b> | <b>Common name</b> | <b>5'-UTR (bp)</b> |
|------------------------|--------------------|--------------------|
| YBR025C                | <i>OLA1</i>        | 132                |
| YBR026C                | <i>ETR1</i>        | 100                |
| YBR034C                | <i>HMT1</i>        | 100                |
| YBR036C                | <i>CSG2</i>        | 100                |
| YBR046C                | <i>ZTA1</i>        | 100                |
| YBR050C                | <i>REG2</i>        | 187                |
| YBR052C                | <i>RFS1</i>        | 100                |
| YBR066C                | <i>NRG2</i>        | 142                |
| YBR084W                | <i>MIS1</i>        | 103                |
| YCR012W                | <i>PGK1</i>        | 100                |
| YDL171C                | <i>GLT1</i>        | 110                |
| YIL162W                | <i>SUC2</i>        | 100                |
| YLR081W                | <i>GAL2</i>        | 100                |
| YML029W                | <i>USA1</i>        | 100                |
| YML031W                | <i>NDC1</i>        | 100                |
| YML032C                | <i>RAD52</i>       | 100                |
| YML043C                | <i>RRN11</i>       | 164                |
| YML046W                | <i>PRP39</i>       | 100                |
| YML048W                | <i>GSF2</i>        | 100                |
| YML050W                | <i>AIM32</i>       | 100                |
| YML051W                | <i>GAL80</i>       | 100                |
| YML054C                | <i>CYB2</i>        | 100                |
| YML059C                | <i>NTE1</i>        | 100                |
| YML060W                | <i>OGG1</i>        | 100                |
| YML061C                | <i>PIF1</i>        | 100                |
| YML062C                | <i>MFT1</i>        | 100                |
| YML065W                | <i>ORC1</i>        | 100                |
| YML067C                | <i>ERV41</i>       | 100                |
| YML070W                | <i>DAK1</i>        | 100                |
| YML071C                | <i>COG8</i>        | 109                |
| YML076C                | <i>WAR1</i>        | 100                |
| YML080W                | <i>DUS1</i>        | 126                |
| YML081W                | <i>TDA9</i>        | 143                |
| YML086C                | <i>ALO1</i>        | 159                |
| YML087C                | <i>AIM33</i>       | 100                |
| YML088W                | <i>UFO1</i>        | 100                |
| YML091C                | <i>RPM2</i>        | 264                |
| YML093W                | <i>UTP14</i>       | 100                |

| <b>Systematic name</b> | <b>Common name</b> | <b>5'-UTR (bp)</b> |
|------------------------|--------------------|--------------------|
| YML096W                | YML096W            | 100                |
| YML097C                | <i>VPS9</i>        | 100                |
| YML099C                | <i>ARG81</i>       | 100                |
| YML100W                | TSL1               | 100                |
| YML102W                | <i>CAC2</i>        | 100                |
| YML103C                | NUP188             | 100                |
| YML107C                | PLM39              | 100                |
| YML115C                | <i>VAN1</i>        | 100                |
| YML116W                | <i>ATR1</i>        | 101                |
| YML123C                | <i>PHO84</i>       | 100                |
| YML127W                | <i>RSC9</i>        | 100                |
| YML130C                | <i>ERO1</i>        | 106                |
| YMR303C                | <i>ADH2</i>        | 100                |

**table S4. qPCR primers detecting marked mRNAs and their amplification efficiencies.**

| Systematic name | Common name  | Forward primer (5' to 3')          | Reverse primer (5' to 3')         | Eff. (%) |
|-----------------|--------------|------------------------------------|-----------------------------------|----------|
| YBR025C         | <i>OLA1</i>  | TCCAGGAAACAATTTAAAA<br>GCCGG       | GTGATGGCTTGGAAA<br>AAGGTAGAC      | 1        |
| YBR026C         | <i>ETR1</i>  | CCAAACATTTTAAGTCGCTC<br>ATCTATTC   | TTTTCACTGACAAAAC<br>CTTGGTACA     | 1.09     |
| YBR034C         | <i>HMT1</i>  | GCTAAGTGAGAGTGAGCAA<br>CA          | CGAACAGTATCTTGAA<br>GCATCTCT      | 0.96     |
| YBR036C         | <i>CSG2</i>  | ACGTGATTCAAACCTAAGTG<br>CTTATCT    | GTCGCCGTTAGTTTCA<br>GGC           | 1        |
| YBR046C         | <i>ZTA1</i>  | TGATGAAATTGGAGGTTAT<br>GACGTAATC   | TGATTAGTAACTCTTC<br>CTCCGAAATCG   | 0.95     |
| YBR050C         | <i>REG2</i>  | GAAAGTGTGTGAGAATGAC<br>TTTGAGTA    | TTTACTACTCTCCTCC<br>TCTTCTGGA     | 1.12     |
| YBR052C         | <i>RFS1</i>  | CCACATTGGCTGAGAACGA<br>AAAA        | TGGCACTTGGAAAATC<br>TCAGCC        | 0.87     |
| YBR066C         | <i>NRG2</i>  | TTTCAGGCATAAGAGTTATC<br>TGGGAGG    | AGAAAGTGCAGATTT<br>CCCATCA        | 0.92     |
| YBR084W         | <i>MIS1</i>  | TCGCCTACAGTACACGCTTC<br>TC         | TGGCTTTTTCTCGAAT<br>AGATTGAGCA    | 1.06     |
| YCR012W         | <i>PGK1</i>  | CATAAGGGTCGATTTCAAC<br>GTCC        | GCAAAGCAGCAACAA<br>TTCTTTGG       | 1        |
| YDL171C         | <i>GLT1</i>  | GAATTAGAAAAGAAAGCAT<br>GCCAGTG     | TATAGTGCCTCCTTCG<br>TAAGCTTC      | 0.98     |
| YIL162W         | <i>SUC2</i>  | TGACTAATGATACAAGCGA<br>TAGACCTT    | CCATTTGGGTCATTCA<br>TCCAGC        | 0.97     |
| YLR081W         | <i>GAL2</i>  | CTGGCGAGGATGTCATCTCT<br>TC         | TTAGAATACTTTTGAG<br>ATTGTGCGC     | 0.99     |
| YML029W         | <i>USA1</i>  | ATGGTCAAGCGAAATAGAC<br>CTAATC      | TATATTGAAGTAGTCG<br>CCCAACCG      | 0.92     |
| YML031W         | <i>NDC1</i>  | CGTACCATACCATATTCAGT<br>GATGTG     | AACCTCGTAACTAAAT<br>GGTTGAATCG    | 1.21     |
| YML032C         | <i>RAD52</i> | TTCGGTAACCATTCGGAAG<br>ATATTCA     | ATACTCAGGTCCTAAT<br>TTCTTGCCA     | 0.98     |
| YML043C         | <i>RRN11</i> | GCTCAAAGAAGAAAATTGA<br>AATACCAATAC | TCTGTGGTAGTAGATT<br>TCTTGGAAATTC  | 1.05     |
| YML046W         | <i>PRP39</i> | CTGATGCGCTACGTGGATT<br>G           | CCAGTCTAAACCACG<br>ATATGCTTG      | 1.12     |
| YML048W         | <i>GSF2</i>  | TTCAAGTCTCTAACGAAGA<br>CACCA       | CCGTCTTGAAGGGA<br>AAATCTTC        | 0.78     |
| YML050W         | <i>AIM32</i> | CTTCCATCATAGTTTTAAGC<br>ACATTAGC   | GCGTTTTATTTCTTGGC<br>AATAACAGTTTG | 0.84     |
| YML051W         | <i>GAL80</i> | GTATGGCGGGGTAATGTGT<br>CTT         | ATTAGGGTGGGTTTCG<br>TCGG          | 1.08     |
| YML054C         | <i>CYB2</i>  | TACGGTTCAACGGTACCTA<br>AATCC       | AGTCCATGACTGTGTG<br>CGTTTT        | 1.22     |
| YML059C         | <i>NTE1</i>  | TTGCATGCGTTCAATGAATT<br>GCA        | AAGGCTATTCTTGGTG<br>TTTTGGC       | 1.04     |
| YML060W         | <i>OGG1</i>  | CTAGCTAACGTCTTCAGGC<br>TG          | TGCTGTACTGGTTTAA<br>CTTTTCATCC    | 0.89     |
| YML061C         | <i>PIF1</i>  | ACCTAGGAGACCTTTTATCT<br>GTAGT      | CGATAGTTTGGCGTGC<br>GATA          | 0.95     |

| Systematic name | Common name   | Forward primer (5' to 3')          | Reverse primer (5' to 3')                 | Eff. (%) |
|-----------------|---------------|------------------------------------|-------------------------------------------|----------|
| YML062C         | <i>MFT1</i>   | CACTACAGCGAGGTTGACA<br>CT          | CCTGTCAGCTTGTTA<br>CTTTCC                 | 0.98     |
| YML065W         | <i>ORC1</i>   | AACGTTGAAGGATTTACAG<br>GGTTG       | TCCATCGATTATGTTA<br>CCTTGTTTCATC          | 1.07     |
| YML067C         | <i>ERV41</i>  | GTACAAAAAAGTCGACC<br>AAGGGT        | ACCAAACCTCGGTCCAT<br>GCTATAAA             | 0.93     |
| YML070W         | <i>DAK1</i>   | TCTCAAAGGCTTCGCGCTA<br>G           | CGGAATCGGTCTTTCT<br>GAAGAGA               | 1.1      |
| YML071C         | <i>COG8</i>   | CAAAAGCGCTTGAGCCTTG                | TCAAGGCTCAAGCGCT<br>TTTG                  | 1.09     |
| YML076C         | <i>WAR1</i>   | GACTGAACCTGCCCTGAGT<br>AG          | TGACGTCCAGTTAGTT<br>TTTGCATC              | 1.16     |
| YML080W         | <i>DUS1</i>   | GACTGAACCTGCCCTGAGT<br>AG          | GTCAAAAAGCTGACG<br>TCCAGTTAG              | 1.16     |
| YML081W         | <i>TDA9</i>   | ATCCTCCATTACCTCTGTTG<br>ATAGA      | TGGGGATCGGTAGTA<br>CTTGTATT               | 1.13     |
| YML086C         | <i>ALO1</i>   | GGGCCGGAATATACTCAGC<br>TAAA        | AACTCGACAACCTCAT<br>CAATTGAAC             | 0.89     |
| YML087C         | <i>AIM33</i>  | CCGTTTTATCCTTTCTGCAC<br>AGG        | CCACGATTCTACCATT<br>TTGCGTT               | 1        |
| YML088W         | <i>UFO1</i>   | CCCGAAATCCTGATAAATA<br>TATTCTCACAC | TAGAAAGTTCTTGCAA<br>CGTGAACAA             | 0.97     |
| YML091C         | <i>RPM2</i>   | CCGCTCAGAAAAAGACAGC<br>AAC         | CAAACCTTGGTTTTGC<br>CTTAGATACT            | 0.97     |
| YML093W         | <i>UTP14</i>  | TTTTGGACGCATTACAGCTT<br>GC         | CTTTGTGATTGTCGC<br>TGGAGTT                | 1.1      |
| YML096W         | YML096<br>W   | TGATGAATTGATTGAGTTTC<br>CAGAAGG    | TGTTGAAAATCGACG<br>ATTCATTGGT             | 1.04     |
| YML097C         | <i>VPS9</i>   | TTCAGCCAGTTAGAGCAAG<br>CA          | CCGCTGCCCTATTAGG<br>ATCATC                | 0.89     |
| YML099C         | <i>ARG81</i>  | AAAGACGTTACAGGCTGC<br>T            | GGATGCCGAAGATCA<br>CACTTAAC               | 0.97     |
| YML100W         | <i>TSL1</i>   | AATTCGAGCTAGATACGTC<br>ACTCC       | CATAGCCTGGATGTTC<br>ACGAGA                | 1.1      |
| YML102W         | <i>CAC2</i>   | TCCAAAAGAATAGCGCAAA<br>TGACA       | ATCCTAACCTTGTTAT<br>CACCACCA              | 0.96     |
| YML103C         | <i>NUP188</i> | CCTTCACTCATGTAGCAAAC<br>TTCAT      | AATTGCTTGGCATCCA<br>CAGC                  | 0.97     |
| YML107C         | <i>PLM39</i>  | TTCGCTGGATAAAAACACG<br>AAACT       | CCATTTGGTAATAAGT<br>CGCTCTCC              | 1        |
| YML114C         | <i>TAF8</i>   | AGTTAAACTCCTTAAACATC<br>TGCATTTCAA | AGTGTTAAATTGTGCA<br>GGTTCCGA              | 0.99     |
| YML115C         | <i>VAN1</i>   | CAACGGTCTTAGTCTGCCA<br>TT          | CTGAGCGTTTGTCTT<br>GATGTTG                | 0.92     |
| YML116W         | <i>ATR1</i>   | ATGAGAACGAAACTGAGCT<br>ACCTG       | GCTGTTGCTGTAAAG<br>ATTCTCCG               | 1.3      |
| YML123C         | <i>PHO84</i>  | GTCTTCATAAGGAGCATCT<br>AACCGA      | AGCAAAATCATTCAA<br>ATGGTTGTGG             | 0.88     |
| YML127W         | <i>RSC9</i>   | AGGCTCCGGCGACTAGCT                 | ATTAGACTGTAATCGA<br>GACACTTTAATAGGGT<br>T | 1.06     |
| YML130C         | <i>ERO1</i>   | CTGCTACATCTAATAATAGC<br>TACATCGC   | GTCGACCTTACAAAA<br>GTGAGTGTC              | 1.06     |
| YMR303C         | <i>ADH2</i>   | CAACGGCAAATTAGAACAC<br>AAGGA       | CAGACACCAGAGTAC<br>TTGACGT                | 1.21     |

**table S5. qPCR primers detecting endogenous mRNAs with their efficiencies.**

| <b>Systematic name</b> | <b>Common name</b> | <b>Forward primer (5' to 3')</b>   | <b>Reverse primer (5' to 3')</b> | <b>Eff. (%)</b> |
|------------------------|--------------------|------------------------------------|----------------------------------|-----------------|
| YBR123C                | <i>TFC1</i>        | GCGGTATTGACAGCAG<br>GTTCAA         | CCATCCAGTTAGTTCATTCCG<br>CCTTA   | 1.08            |
| YER100W                | <i>UBC6</i>        | ACCATCAGAAGAAGA<br>CATTAGCAAGA     | TCATCACCTGTATTTGCCGC<br>AT       | 0.93            |
| YBR018C                | <i>GAL7</i>        | CTAGCCATTCCCATAG<br>ACGTTACAA      | TTGACCTAACCAAGGTCTTT<br>TAGCTC   | 1.01            |
| YBR020W                | <i>GAL1</i>        | ACCTGAGTTCAATTCT<br>AGCGCAA        | GCGATCTAGCAACAAAATC<br>CGGTTTA   | 1.00            |
| YBR025C                | <i>OLA1</i>        | TCCAGGTAATAACTTG<br>AAAGCCGG       | GTGATGGCTTGAAAAAGG<br>TAGAC      | 0.96            |
| YBR026C                | <i>ETR1</i>        | CCAAGCACTTCAAATC<br>GCTCATCTATTC   | TTTTACTGACAAAACCTTG<br>GTACA     | 0.85            |
| YBR034C                | <i>HMT1</i>        | GCTAAGTGAAAGCGA<br>ACAGCA          | CGAACAGTATCTTGAAGCA<br>TCTCT     | 0.87            |
| YBR036C                | <i>CSG2</i>        | ACGTGATTCAAACAAA<br>ATGTTTGTCT     | GTCGCCGTTAGTTTCAGGC              | 0.98            |
| YBR046C                | <i>ZTA1</i>        | TGATGAAATTGGTGGA<br>TACGATGTAATC   | TGATGAAATTGGAGGTTAT<br>GACGTAATC | 0.92            |
| YBR050C                | <i>REG2</i>        | GAAAGTGTGTGAGAAT<br>GACTTTGAGTA    | TTTACTACTTTTCTTCTCCT<br>CTGGA    | 0.77            |
| YBR052C                | <i>RFS1</i>        | TTGCCACATTAGCAGA<br>AAATGAAAAAAA   | CCACATTGGCTGAGAACGA<br>AAAA      | 0.86            |
| YBR066C                | <i>NRG2</i>        | AGATAGGAAATGTGA<br>ATTGCCATCAAT    | TTTCAGGCATAAGAGTTAT<br>CTGGGAGG  | 0.92            |
| YBR084W                | <i>MIS1</i>        | TCGCCAACTGTGCATG<br>CTTCTC         | TGGCTTTTCTCGAATAGAT<br>TGAGCA    | 1.06            |
| YCR012W                | <i>PGK1</i>        | CATCAGAGTTGACTTC<br>AACGTCC        | GCAAAGCAGCAACAATTCT<br>TTGG      | 0.86            |
| YDL171C                | <i>GLT1</i>        | GAATTAGAAAAGAAA<br>GCATGCCAGTG     | AATTGTCCACCTTCGTAA<br>GCTTC      | 1.04            |
| YIL162W                | <i>SUC2</i>        | TGACAAACGAAACTA<br>GCGATAGACCTT    | CCATTTGGGTCATTTCATCCA<br>GC      | 1.02            |
| YLR081W                | <i>GAL2</i>        | TGACAAACGAAACTA<br>GCGATAGACCTT    | CCATTTGGGTCATTTCATCCA<br>GC      | 0.82            |
| YML029W                | <i>USA1</i>        | ATGGTCAAGCGAGATT<br>GATCTTATC      | TATATTGAAGTAGTCGCC<br>AACCG      | 0.97            |
| YML031W                | <i>NDC1</i>        | CGTACCATACCATCTT<br>TAGCGACGTG     | AACCTCGTAACTAAATGGT<br>TGAATCG   | 0.96            |
| YML032C                | <i>RAD52</i>       | TTCGGTAACCATTCCG<br>AGGACATACA     | ATACTCAGGTCTAATTTCT<br>TGTCCTA   | 0.82            |
| YML043C                | <i>RRN11</i>       | GCTCAAAGAAGAAAG<br>TTAAAGTATCAATAC | TCTGTGGTAGTAGATTTCTT<br>GGAAATTC | 1.04            |
| YML046W                | <i>PRP39</i>       | CTGATGCCCTTCGAGG<br>TTTG           | CCAGTCTAAACCACGATAT<br>GCTTG     | 1.16            |
| YML048W                | <i>GSF2</i>        | TTCAGGTGTCAAATGA<br>AGACACCA       | CCGTCTTGAAGGGAAAAT<br>CTTC       | 0.79            |
| YML050W                | <i>AIM32</i>       | CTCCATCATAGCTTC<br>AAACATATTAGC    | GCGTTTATTTCTTGGAATA<br>ACAGTTTG  | 0.83            |
| YML051W                | <i>GAL80</i>       | CCATAAGAGTCGGATT<br>CGTCGG         | ATTAGGGTGGGTTTCGTCG<br>G         | 1.14            |
| YML054C                | <i>CYB2</i>        | CTGGTGAAGACGTGAT<br>CTCTTCA        | TTAGAATACTTTTGAGATTG<br>TGCGC    | 1.11            |
| YML059C                | <i>NTE1</i>        | TTGCATGCGTTCAATG<br>AATTGCA        | AAGACTGTTTTTCGTGTTTT<br>GGC      | 1.10            |

| Systematic name | Common name   | Forward primer (5' to 3')          | Reverse primer (5' to 3')             | Eff.  |
|-----------------|---------------|------------------------------------|---------------------------------------|-------|
| YML060W         | <i>OGG1</i>   | CTAGCAAATGTGCTAC<br>AGGCTG         | TGCTGTACTGGTTTAACTTT<br>TCATCC        | 0.99  |
| YML061C         | <i>PIF1</i>   | TACGGTTCTACCGTTC<br>CAAAATCC       | CGATAGTTTGGCGTGCGAT<br>A              | 1.11  |
| YML062C         | <i>MFT1</i>   | CACTACAGTGAAGTAG<br>ATACT          | CCTGTCAGCTTGGTTACTTT<br>TCC           | 0.96  |
| YML065W         | <i>ORC1</i>   | AACGTTGAAGGATTTA<br>CAGGGTTG       | GATGAGCAGGGAAATATAA<br>TCGATGGA       | 0.95  |
| YML067C         | <i>ERV41</i>  | GTACAAGAAGAAATC<br>CACCAAGGGT      | ACCAAACCTCGGTCCATGCT<br>ATAAA         | 0.90  |
| YML070W         | <i>DAK1</i>   | TCTCAAAGGGTTTGCC<br>CTTG           | CGGAATCGGTCTTTCTGAA<br>GAGA           | 0.96  |
| YML071C         | <i>COG8</i>   | CAAAAACGGTTAAGTC<br>TTG            | GGAACAGCCCTAGATGAAA<br>AATAAC         | 0.99  |
| YML076C         | <i>WAR1</i>   | AATGATAATTCAAAGA<br>CCGACC         | TGGCCTTATCTATGCATGG<br>GAC            | 0.99  |
| YML080W         | <i>DUS1</i>   | ACCAAGAAGGCCATTT<br>ATCTGTAGT      | CGATAGTTTGGCGTGCGAT<br>A              | 1.08  |
| YML081W         | <i>TDA9</i>   | ATCCTCCACTATCTAT<br>GCTGATAGA      | TGGGGATCGGTAGTACTTG<br>TATT           | 1     |
| YML086C         | <i>ALO1</i>   | GGGCCGGAATTTATTC<br>TGCAAAA        | AACTCGACAACCTCATCAA<br>TTGAAC         | 0.92  |
| YML087C         | <i>AIM33</i>  | TCCGTTTTATCCATTTT<br>GTACTGGATTG   | CCACGATTCTACCATTTTGC<br>GTT           | 1     |
| YML088W         | <i>UFO1</i>   | CCCGAAATCCTGATAA<br>ACATCTTTTCTCAC | TAGAAAGTTCTTGCAACGT<br>GAACAA         | 0.81  |
| YML091C         | <i>RPM2</i>   | CCGCTCAAAGAAAA<br>CTGCAAC          | CAAACCTTGGTTTTGCCTTA<br>GATACT        | 0.90  |
| YML093W         | <i>UTP14</i>  | TTTTGGATGCTTTGCA<br>ACTTGC         | CTTTTGTGATTGTGCTGGA<br>GTT            | 0.98  |
| YML096W         | YML096<br>W   | TGATGAGTTAATCGAA<br>TTTCCAGAAGG    | TGTTGAAAATCGACGATTC<br>ATTGGT         | 0.95  |
| YML097C         | <i>VPS9</i>   | TTCAGCCAATTGGAAC<br>AGGCA          | CCGCTGCCCTATTAGGATC<br>ATC            | 1.02  |
| YML099C         | <i>ARG81</i>  | AAAGACGTTTACTGGG<br>TGTT           | GGATGCCGAAGATCACACT<br>TAAC           | 0.92  |
| YML100W         | <i>TSL1</i>   | AATTCGAGCTTGACAC<br>CTCTCTC        | CATAGCCTGGATGTTACAG<br>AGA            | 1.05  |
| YML102W         | <i>CAC2</i>   | ATCCTCCACTATCTAT<br>GCTGATAGA      | TGGGGATCGGTAGTACTTG<br>TATT           | 0.91  |
| YML103C         | <i>NUP188</i> | CCTTCACTCATGTTGC<br>TAATTTTATGAAC  | AATTGCTTGGCATCCACAG<br>C              | 1     |
| YML107C         | <i>PLM39</i>  | TTCGCTGGACAAGAAT<br>ACCAAAC        | CCATTTGGTAATAAGTCGC<br>TCTCC          | 1.34  |
| YML114C         | <i>TAF8</i>   | TCCCGTAGTTGAAATT<br>CTAAAGAAAACA   | AGTGTTAAATTGTGCAGGT<br>TCCGA          | 0.98  |
| YML115C         | <i>VAN1</i>   | CAATGGACTAAGCCTG<br>CCATT          | CTGAGCGTTTGTCTTGATG<br>TTG            | 0.817 |
| YML116W         | <i>ATR1</i>   | ATGAGAACGAAACTG<br>AGCTACCTG       | AGTGTTAAATTGTGCAGGT<br>TCCGA          | 1.25  |
| YML123C         | <i>PHO84</i>  | GTCTTCATAAAGAACA<br>CCTTACCGA      | AGCAAATCATTCAAATGG<br>TTGTGG          | 0.86  |
| YML127W         | <i>RSC9</i>   | CACCCGCCACAAGCTC<br>C              | ATTAGACTGTAATCGAGAC<br>ACTTTAATAGGGTT | 1.06  |
| YML130C         | <i>ERO1</i>   | CTGCAACTTCAAACAA<br>TAGCTACATCGC   | GTCGACCTTACAAAAGTGA<br>GTGTC          | 1.06  |
| YMR303C         | <i>ADH2</i>   | CAACGGCAAGTTGGA<br>GCATAAGGA       | CAGACACCAGACTTGA<br>CGT               | 1.09  |



**table S6. Cross-reaction of primers to detect the marked mRNA with the endogenous mRNAs.** Differences between the Ct values ( $\Delta$ Ct) obtained with primers matching the marked and endogenous mRNAs.  $\Delta$ Ct is shown for the examined mRNAs at the standard annealing temperature of the qPCR, 60°C. If  $\Delta$ Ct(60°C) < 5, the  $\Delta$ Ct was also measured at 68°C. The template for the qPCR is cDNA reverse transcribed from endogenous (wt) mRNAs.

| Systematic name | Common name  | $\Delta$ Ct (60°C) | $\Delta$ Ct (68°C) | Systematic name | Common name    | $\Delta$ Ct (60°C) | $\Delta$ Ct (68°C) |
|-----------------|--------------|--------------------|--------------------|-----------------|----------------|--------------------|--------------------|
| YBR025C         | <i>OLA1</i>  | 10.71              |                    | YML065W         | <i>ORC1</i>    | 7.87               |                    |
| YBR026C         | <i>ETR1</i>  | 3.08               | 13.26              | YML067C         | <i>ERV41</i>   | 9.08               |                    |
| YBR034C         | <i>HMT1</i>  | 13.80              |                    | YML070W         | <i>DAK1</i>    | 14.79              |                    |
| YBR036C         | <i>CSG2</i>  | 5.69               |                    | YML071C         | <i>COG8</i>    | 14.75              |                    |
| YBR046C         | <i>ZTA1</i>  | 8.61               |                    | YML076C         | <i>WAR1</i>    | 5.75               |                    |
| YBR050C         | <i>REG2</i>  | 9.89               |                    | YML080W         | <i>DUS1</i>    | 12.63              |                    |
| YBR052C         | <i>RFS1</i>  | 3.28               | 11.30              | YML086C         | <i>ALO1</i>    | 13.39              |                    |
| YBR066C         | <i>NRG2</i>  | 8.83               |                    | YML087C         | <i>AIM33</i>   | 22.45              |                    |
| YBR084W         | <i>MIS1</i>  | 5.29               |                    | YML088W         | <i>UFO1</i>    | 8.69               |                    |
| YCR012W         | <i>PGK1</i>  | 7.29               |                    | YML091C         | <i>RPM2</i>    | 13.80              |                    |
| YDL171C         | <i>GLT1</i>  | 0.62               | 7.57               | YML093W         | <i>UTP14</i>   | 15.39              |                    |
| YIL162W         | <i>SUC2</i>  | 2.29               | 8.41               | YML096W         | <i>YML096W</i> | 10.24              |                    |
| YLR081W         | <i>GAL2</i>  | 4.24               |                    | YML097C         | <i>VPS9</i>    | 14.19              |                    |
| YML029W         | <i>USA1</i>  | 20.57              |                    | YML099C         | <i>ARG81</i>   | 15.65              |                    |
| YML031W         | <i>NDC1</i>  | 5.54               |                    | YML100W         | <i>TSL1</i>    | 11.79              |                    |
| YML032C         | <i>RAD52</i> | 11.71              |                    | YML102W         | <i>CAC2</i>    | 7.87               |                    |
| YML043C         | <i>RRN11</i> | 11.36              |                    | YML103C         | <i>NUP188</i>  | 27.28              |                    |
| YML046W         | <i>PRP39</i> | 8.85               |                    | YML107C         | <i>PML39</i>   | 14.31              |                    |
| YML048W         | <i>GSF2</i>  | 8.12               |                    | YML114C         | <i>TAF8</i>    | 7.33               |                    |
| YML050W         | <i>AIM32</i> | 9.05               |                    | YML115C         | <i>VANI</i>    | 5.42               |                    |
| YML051W         | <i>GAL80</i> | 8.69               |                    | YML116W         | <i>ATR1</i>    | 12.34              |                    |
| YML054C         | <i>CYB2</i>  | 8.47               |                    | YML123C         | <i>PHO84</i>   | 8.73               |                    |
| YML059C         | <i>NTE1</i>  | 5.26               |                    | YML127W         | <i>RSC9</i>    | 23.96              |                    |
| YML060W         | <i>OGG1</i>  | 15.59              |                    | YML130C         | <i>ERO1</i>    | 0.46               | 6.75               |
| YML061C         | <i>PIF1</i>  | 8.43               |                    | YMR303C         | <i>ADH2</i>    | 12.01              |                    |
| YML062C         | <i>MFT1</i>  | 18.53              |                    |                 |                |                    |                    |

**table S7. Mean, Fano factor, and CV of the RNA molecule copy number distributions.**

| <b>Gene<br/>common<br/>name</b> | <b>Endogenous Promoter</b> |                        |           | <b>Substitutional promoter</b> |                        |           |
|---------------------------------|----------------------------|------------------------|-----------|--------------------------------|------------------------|-----------|
|                                 | <b>Mean</b>                | <b>Fano<br/>factor</b> | <b>CV</b> | <b>Mean</b>                    | <b>Fano<br/>factor</b> | <b>CV</b> |
| <i>USA1</i>                     | 3.35                       | 1.31                   | 0.62      | 33.08                          | 8.23                   | 0.50      |
| <i>COG8</i>                     | 3.27                       | 1.40                   | 0.65      | 35.84                          | 10.89                  | 0.55      |
| <i>UTP14</i>                    | 4.73                       | 1.77                   | 0.61      | 36.25                          | 9.87                   | 0.52      |
| <i>PIF1</i>                     | 3.19                       | 2.80                   | 0.94      | 35.86                          | 23.12                  | 0.80      |
| <i>DAK1</i>                     | 8.69                       | 2.44                   | 0.53      | 89.05                          | 30.49                  | 0.59      |
